# Supplementary material
Source: PubMed Central journal article supplement (PMC5835732)
Supplement: AEM.02430-17_zam006188363s1.pdf [file AEM.02430-17_zam006188363s1.pdf]

Table S1. Origin of samples and isolates for this study.

Samples were collected at 18 dairy farms, a subset of 30 farms described previously (1). For 21 of the 30 farms in that study non-selective culture media were used in addition to media supplemented with beta-lactam antimicrobials. Among those 21 farms, three had no samples that were positive for *E. coli* carrying *bla*<sub>CTX-M</sub>, leaving 18 farms for the current study. On each of those 18 farms an average of 45 samples was collected including one to four samples from adult cows and 1 to 4 from each age group of pre-weaned calves between 0 and 63 days of age in one-week intervals. The isolates for the current study were chosen to include equal numbers of *bla*<sub>CTX-M</sub>-negative and *bla*<sub>CTX-M</sub>-positive isolates from each age group of pre-weaned calves and adult cows on the farm.

| Calf age in days (7-day intervals) |      |       |     |      |       |       |       |       |       |       |       |       |                                          |                                          |
|------------------------------------|------|-------|-----|------|-------|-------|-------|-------|-------|-------|-------|-------|------------------------------------------|------------------------------------------|
| Region <sup>a</sup>                | Farm | Adult | 1-7 | 8-14 | 15-21 | 22-28 | 29-35 | 36-42 | 43-49 | 50-56 | 57-63 | Total | <i>bla</i> <sub>CTX-M</sub> <sup>+</sup> | <i>bla</i> <sub>CTX-M</sub> <sup>-</sup> |
| 2                                  | 1    | 6     | 4   | 2    | 3     | 3     | 2     |       | 2     | 2     |       | 24    | 12                                       | 12                                       |
| 1                                  | 6    | 4     | 1   | 1    |       | 2     |       |       |       | 4     |       | 12    | 6                                        | 6                                        |
| 1                                  | 9    | 4     | 1   | 1    | 1     |       | 1     | 1     |       | 2     | 1     | 12    | 6                                        | 6                                        |
| 1                                  | 11   |       | 1   | 1    | 1     | 1     | 1     | 2     | 1     |       |       | 8     | 4                                        | 4                                        |
| 1                                  | 13   | 1     | 1   |      |       |       |       |       |       |       |       | 2     | 1                                        | 1                                        |
| 1                                  | 15   | 4     | 3   | 1    |       |       |       | 1     |       | 2     | 1     | 12    | 6                                        | 6                                        |
| 2                                  | 18   |       | 2   | 1    |       |       |       | 2     |       | 1     |       | 6     | 3                                        | 3                                        |

|   |       |    |    |    |    |    |    |    |    |    |    |     |     |     |
|---|-------|----|----|----|----|----|----|----|----|----|----|-----|-----|-----|
| 2 | 21    | 5  |    |    | 1  | 2  | 2  |    |    | 2  |    | 12  | 6   | 6   |
| 1 | 25    | 4  | 1  | 1  | 3  | 1  | 1  | 1  | 3  |    | 1  | 16  | 8   | 8   |
| 1 | 28    | 2  |    |    |    | 2  | 2  |    | 3  | 1  |    | 10  | 5   | 5   |
| 2 | 29    | 4  |    | 4  | 1  | 1  | 4  |    | 1  |    | 1  | 16  | 8   | 8   |
| 2 | 32    | 4  |    | 2  | 2  | 1  | 3  | 2  |    |    | 2  | 16  | 8   | 8   |
| 2 | 38    | 4  |    | 1  | 2  | 3  | 1  | 2  | 2  | 1  |    | 16  | 8   | 8   |
| 2 | 41    |    | 1  |    |    | 3  | 2  | 4  | 4  |    | 2  | 16  | 8   | 8   |
| 2 | 54    | 6  | 1  | 1  | 2  | 1  | 1  | 3  | 1  | 2  |    | 18  | 9   | 9   |
| 2 | 55    | 4  | 1  | 1  | 1  | 1  | 3  | 2  | 1  | 1  | 1  | 16  | 8   | 8   |
| 2 | 65    | 6  | 3  | 2  | 2  | 3  | 3  |    |    | 3  | 2  | 24  | 12  | 12  |
| 2 | 120   | 4  | 3  | 2  | 1  |    | 1  | 3  |    | 2  |    | 16  | 8   | 8   |
|   | Total | 62 | 23 | 21 | 20 | 24 | 27 | 23 | 18 | 23 | 11 | 252 | 126 | 126 |

<sup>a</sup> Region 1, northwestern Washington State; Region 2, eastern Washington State.

1. **Davis MA, Sischo WM, Jones LP, Moore DA, Ahmed S, Short DM, Besser TE.** 2015. Recent Emergence of Escherichia coli with Cephalosporin Resistance Conferred by blaCTX-M on Washington State Dairy Farms. *Appl Environ Microbiol* **81**:4403-4410.

Table S2. Listing of commensal *E. coli* used in this study.

| Isolate number | Study <sup>a</sup> | Washington Region | Farm | Calf or Adult | Calf age in days | <i>bla</i> <sub>CTX-M</sub> PCR Result | CTXM Group | CTXM-Allele | Resistance profile <sup>b</sup> | MLST ST | ST complex | eBURSTCC | Replicon Type |
|----------------|--------------------|-------------------|------|---------------|------------------|----------------------------------------|------------|-------------|---------------------------------|---------|------------|----------|---------------|
| 15770          | Study A            | Eastern WA        | 41   | Calf          | 22               | +                                      | 9          |             | AmCfTioCNaSGTeSxt               | 744     |            | CC10     |               |
| 15798          | Study A            | Eastern WA        | 21   | Calf          | 26               | +                                      | 1          |             | AmCfTioSGTeSxt                  | 540     |            |          |               |
| 15807          | Study A            | Eastern WA        | 29   | Adult         |                  | +                                      | 9          |             | AmCfTioCGTeSxt                  | 761     |            | CC10     | FIB           |
| 15818          | Study A            | Eastern WA        | 29   | Calf          | 29               | +                                      | 1          |             | AmCfTioGSGTeSxt                 | 3018    |            |          | FIA           |
| 15823          | Study A            | Eastern WA        | 38   | Adult         |                  | +                                      | 9          |             | AmCfTio                         | 4089    |            |          |               |
| 15831          | Study A            | Eastern WA        | 38   | Calf          | 19               | +                                      | 9          |             | AmCfTioCSGTeSxt                 | 761     |            | CC10     | N             |
| 15832          | Study A            | Eastern WA        | 38   | Calf          | 27               | +                                      | 9          |             | AmCfTioCSGTeSxt                 | 761     |            | CC10     | F             |
| 15872          | Study A            | Eastern WA        | 54   | Adult         |                  | +                                      | 9          |             | AmCfTioSTe                      | 48      | ST10 Cplx  | CC10     | II            |
| 15879          | Study A            | Eastern WA        | 54   | Adult         |                  | +                                      | 9          |             | AmCfTioCNaGTe                   | 224     |            |          | NT            |
| 15884          | Study A            | Eastern WA        | 54   | Calf          | 1                | +                                      | 9          |             | AmCfTioSTe                      | 48      | ST10 Cplx  | CC10     |               |
| 15901          | Study A            | Eastern WA        | 54   | Calf          | 26               | +                                      | 9          |             | AmCfTioSTe                      | 48      | ST10 Cplx  | CC10     | NT            |
| 15907          | Study A            | Eastern WA        | 29   | Adult         |                  | -                                      |            |             |                                 | 58      | ST155 Cplx | CC58     |               |
| 15909          | Study A            | Eastern WA        | 29   | Adult         |                  | -                                      |            |             | STe                             | 29      | ST29 Cplx  | CC29     |               |
| 15917          | Study A            | Eastern WA        | 29   | Calf          | 10               | -                                      |            |             | AnAmCfTioCGNaSGTeSxt            | 4090    |            |          |               |
| 15919          | Study A            | Eastern WA        | 29   | Calf          | 13               | -                                      |            |             | AnGSGTeSxt                      | 23      | ST23 Cplx  | CC88     |               |
| 15927          | Study A            | Eastern WA        | 29   | Calf          | 22               | -                                      |            |             | GTe                             | 4091    |            | CC58     |               |
| 15936          | Study A            | Eastern WA        | 29   | Calf          | 33               | -                                      |            |             |                                 | 336     | ST278 Cplx |          |               |
| 15938          | Study A            | Eastern WA        | 29   | Calf          | 35               | -                                      |            |             | Te                              | 56      | ST155 Cplx |          |               |
| 15978          | Study A            | Northwestern WA   | 25   | Calf          | 44               | +                                      | 1          |             | AmCfTio                         | 3476    |            | CC10     |               |
| 15988          | Study A            | Northwestern WA   | 25   | Calf          | 60               | +                                      | 1          |             | AmCfTioSTe                      | 58      | ST155 Cplx | CC58     |               |
| 15991          | Study A            | Northwestern WA   | 25   | Adult         |                  | +                                      | 1          |             | AmCfTio                         | 154     |            |          |               |
| 15994          | Study A            | Northwestern WA   | 9    | Calf          | 42               | +                                      | 9          |             | AmCfTioSTe                      | 48      | ST10 Cplx  | CC10     |               |
| 16006          | Study A            | Northwestern WA   | 11   | Calf          | 36               | +                                      | 9          | CTXM-65     | AmCfTio                         | 540     |            |          | N             |
| 16007          | Study A            | Northwestern WA   | 9    | Adult         |                  | +                                      | 9          |             | AmCfTioSTe                      | 48      | ST10 Cplx  | CC10     |               |
| 16009          | Study A            | Northwestern WA   | 11   | Calf          | 2                | +                                      | 9          |             | AmCfTioSTe                      | 48      | ST10 Cplx  | CC10     |               |
| 16025          | Study A            | Eastern WA        | 29   | Calf          | 57               | -                                      |            |             | CGTe                            | 765     |            | CC29     |               |
| 16030          | Study A            | Eastern WA        | 120  | Calf          | 1                | -                                      |            |             | AmCfGNaSGSxt                    | 117     |            |          |               |
| 16034          | Study A            | Eastern WA        | 120  | Calf          | 5                | -                                      |            |             | Te                              | 1122    |            |          |               |
| 16036          | Study A            | Eastern WA        | 120  | Calf          | 9                | -                                      |            |             |                                 | 3042    |            |          |               |
| 16060          | Study A            | Eastern WA        | 120  | Calf          | 39               | -                                      |            |             |                                 | 660     |            |          |               |
| 16061          | Study A            | Eastern WA        | 120  | Calf          | 41               | -                                      |            |             |                                 | 1326    |            |          |               |
| 16072          | Study A            | Eastern WA        | 55   | Adult         |                  | +                                      | 9          |             | AmCfTio                         | 58      | ST155 Cplx | CC58     |               |
| 16091          | Study A            | Eastern WA        | 55   | Calf          | 21               | +                                      | 1          |             | AnAmCfTioGNaSGTeSxt             | 648     |            |          |               |
| 16092          | Study A            | Eastern WA        | 21   | Calf          | 17               | -                                      |            |             | AmCfTioSGTe                     | 88      | ST23 Cplx  | CC88     |               |
| 16105          | Study A            | Northwestern WA   | 6    | Adult         |                  | +                                      | 9          |             | AmCfTioCNaSGTeSxt               | 162     | ST469 Cplx |          |               |
| 16108          | Study A            | Northwestern WA   | 6    | Calf          | 12               | +                                      | 9          |             | AmCfTioCNaSGTeSxt               | 162     | ST469 Cplx |          |               |
| 16114          | Study A            | Eastern WA        | 21   | Adult         |                  | -                                      |            |             |                                 | 101     | ST101 Cplx |          |               |
| 16116          | Study A            | Northwestern WA   | 6    | Calf          | 54               | +                                      | 9          |             | AmCfTioCNaSGTeSxt               | 410     | ST23 Cplx  |          |               |
| 16122          | Study A            | Northwestern WA   | 28   | Calf          | 24               | +                                      | 1          | CTXM-15     | AmCfTioSGTe                     | 88      | ST23 Cplx  | CC88     | FIA/FIB       |
| 16126          | Study A            | Northwestern WA   | 28   | Calf          | 44               | +                                      | 9          | CTXM-14     | AmCfTioCSGTeSxt                 | 155     | ST155 Cplx | CC58     | B/O           |

| Isolate number | Study <sup>a</sup> | Washington Region | Farm | Calf or Adult | Calf age in days | <i>bla</i> <sub>CTX-M</sub> PCR Result | CTXM Group | CTXM-Allele | Resistance profile <sup>b</sup> | MLST ST | ST complex | eBURSTCC | Replicon Type |
|----------------|--------------------|-------------------|------|---------------|------------------|----------------------------------------|------------|-------------|---------------------------------|---------|------------|----------|---------------|
| 16131          | Study A            | Northwestern WA   | 15   | Calf          | 2                | +                                      | 9          | CTXM-14     | AmCfTioTe                       | 48      | ST10 Cplx  | CC10     | FIB           |
| 16137          | Study A            | Eastern WA        | 21   | Adult         |                  | -                                      |            |             |                                 | 10      | ST10 Cplx  | CC10     |               |
| 16138          | Study A            | Eastern WA        | 21   | Adult         |                  | -                                      |            |             |                                 | 155     | ST155 Cplx | CC58     |               |
| 16180          | Study A            | Eastern WA        | 120  | Adult         |                  | -                                      |            |             |                                 | 4250    |            |          |               |
| 16182          | Study A            | Eastern WA        | 120  | Adult         |                  | -                                      |            |             |                                 | 187     |            |          |               |
| 16188          | Study A            | Eastern WA        | 120  | Calf          | 42               | -                                      |            |             | AmS                             | 69      | ST69 Cplx  |          |               |
| 16206          | Study A            | Eastern WA        | 54   | Calf          | 37               | +                                      | 9          |             | AmCfTioSTe                      | 48      | ST10 Cplx  | CC10     |               |
| 16207          | Study A            | Northwestern WA   | 15   | Calf          | 54               | +                                      | 9          |             | AmCfTioCNaSGTeSxt               | 162     | ST469 Cplx |          |               |
| 16214          | Study A            | Northwestern WA   | 15   | Adult         |                  | +                                      | 9          | CTXM-14     | AmCfTioCNaSGTeSxt               | 162     | ST469 Cplx |          | FIA/FIB       |
| 16218          | Study A            | Northwestern WA   | 1    | Adult         |                  | +                                      | 1          | CTXM-15     | AmCfTio                         | 4249    |            |          | FIB           |
| 16219          | Study A            | Northwestern WA   | 1    | Adult         |                  | +                                      | 1          |             | AmCfTio                         | 227     | ST10 Cplx  |          |               |
| 16221          | Study A            | Northwestern WA   | 1    | Calf          | 3                | +                                      | 1          |             | AmCfTioCNaSGTeSxt               | 744     |            | CC10     |               |
| 16223          | Study A            | Northwestern WA   | 1    | Calf          | 8                | +                                      | 1          |             | AmCfTioCNaSGTeSxt               | 744     |            | CC10     |               |
| 16224          | Study A            | Northwestern WA   | 1    | Calf          | 7                | +                                      | 1          |             | AmCfTioCNaSGTeSxt               | 744     |            | CC10     |               |
| 16229          | Study A            | Northwestern WA   | 1    | Calf          | 16               | +                                      | 1          |             | AmCfTioCNaGTeSxt                | 10      | ST10 Cplx  | CC10     |               |
| 16245          | Study A            | Eastern WA        | 55   | Adult         |                  | -                                      |            |             |                                 | 4094    |            |          |               |
| 16247          | Study A            | Eastern WA        | 55   | Adult         |                  | -                                      |            |             |                                 | 937     |            |          |               |
| 16248          | Study A            | Eastern WA        | 55   | Calf          | 1                | -                                      |            |             | AnAmGNaSGTeSxt                  | 58      | ST155 Cplx | CC58     |               |
| 16253          | Study A            | Eastern WA        | 55   | Calf          | 9                | -                                      |            |             | AmcAmCfCSGTeSxt                 | 398     | ST398 Cplx |          |               |
| 16269          | Study A            | Eastern WA        | 55   | Calf          | 31               | -                                      |            |             | AmcAmCfCSGTeSxt                 | 21      | ST29 Cplx  | CC29     |               |
| 16274          | Study A            | Eastern WA        | 55   | Calf          | 38               | -                                      |            |             | AmCfCGNaSGTeSxt                 | 648     |            |          |               |
| 16277          | Study A            | Eastern WA        | 55   | Calf          | 42               | -                                      |            |             | AmSGTe                          | 56      | ST155 Cplx |          |               |
| 16291          | Study A            | Eastern WA        | 55   | Calf          | 62               | -                                      |            |             | CSTe                            | 10      | ST10 Cplx  | CC10     |               |
| 16301          | Study A            | Eastern WA        | 18   | Calf          | 7                | -                                      |            |             | AnAmcAmCfTioCGNaSGTeSxt         | 540     |            |          |               |
| 16304          | Study A            | Eastern WA        | 18   | Calf          | 10               | -                                      |            |             | AnAmcAmCfGSGTe                  | 10      | ST10 Cplx  | CC10     |               |
| 16393          | Study A            | Eastern WA        | 65   | Calf          | 2                | +                                      | 1          |             | AmCfTioNaSGTeSxt                | 44      | ST10 Cplx  | CC10     |               |
| 16406          | Study A            | Eastern WA        | 65   | Calf          | 13               | +                                      | 1          | CTXM-15     | AmCfTioNaSGTeSxt                | 44      | ST10 Cplx  | CC10     | II            |
| 16409          | Study A            | Eastern WA        | 65   | Calf          | 16               | +                                      | 1          | CTXM-15     | AmCfTioNaSGTeSxt                | 44      | ST10 Cplx  | CC10     | FIA/FIB       |
| 16416          | Study A            | Eastern WA        | 65   | Calf          | 25               | +                                      | 1          |             | AmCfTioCNaSGTeSxt               | 744     |            | CC10     | NT            |
| 16420          | Study A            | Eastern WA        | 65   | Calf          | 35               | +                                      | 1          | CTXM-15     | AmCfTioNaSGTeSxt                | 44      | ST10 Cplx  | CC10     | FIA/FIB       |
| 16422          | Study A            | Eastern WA        | 41   | Calf          | 38               | +                                      | 1          | CTXM-15     | AmCfTioNaSGTeSxt                | 44      | ST10 Cplx  | CC10     | FIA/FIB       |
| 16438          | Study A            | Eastern WA        | 65   | Calf          | 55               | +                                      | 1          | CTXM-15     | AmcAmCfTioSGTeSxt               | 362     |            |          | II            |
| 16440          | Study A            | Eastern WA        | 65   | Calf          | 58               | +                                      | 1          |             | AmcAmCfTioCSGTeSxt              | 761     |            | CC10     |               |
| 16444          | Study A            | Eastern WA        | 65   | Adult         |                  | +                                      | 1          | CTXM-15     | AmCfTioGSGTeSxt                 | 88      | ST23 Cplx  | CC88     | II            |
| 16445          | Study A            | Eastern WA        | 65   | Adult         |                  | +                                      | 1          |             | AmCfTioCSGTeSxt                 | 3042    |            |          | II            |
| 16451          | Study A            | Eastern WA        | 41   | Calf          | 34               | +                                      | 9          | CTXM-27     | AmCfTioCNaSGTeSxt               | 744     |            | CC10     | II            |
| 16452          | Study A            | Eastern WA        | 41   | Calf          | 36               | +                                      | 9          | CTXM-27     | AmCfTio                         | 1629    |            |          | II            |
| 16454          | Study A            | Eastern WA        | 41   | Calf          | 37               | +                                      | 9          | CTXM-27     | AmCfTioCNaSGTeSxt               | 744     |            | CC10     | FIA/FIB       |
| 16457          | Study A            | Eastern WA        | 41   | Calf          | 43               | +                                      | 9          |             | AmCfTioCNaSGTeSxt               | 744     |            | CC10     | NT            |
| 16524          | Study A            | Eastern WA        | 54   | Calf          | 38               | +                                      | 1          | CTXM-15     | AmCfTioSGTeSxt                  | 48      | ST10 Cplx  | CC10     | II            |
| 16545          | Study A            | Eastern WA        | 65   | Calf          | 4                | -                                      |            |             | AmCNaSGTeSxt                    | 744     |            | CC10     |               |

| Isolate number | Study <sup>a</sup> | Washington Region | Farm | Calf or Adult | Calf age in days | <i>bla</i> <sub>CTX-M</sub> PCR Result | CTXM Group | CTXM-Allele | Resistance profile <sup>b</sup> | MLST ST | ST complex | eBURSTCC | Replicon Type |
|----------------|--------------------|-------------------|------|---------------|------------------|----------------------------------------|------------|-------------|---------------------------------|---------|------------|----------|---------------|
| 16549          | Study A            | Eastern WA        | 65   | Calf          | 13               | -                                      |            |             | AmcAmCfCSGTeSxt                 | 16      | ST29 Cplx  | CC29     |               |
| 16550          | Study A            | Eastern WA        | 65   | Calf          | 15               | -                                      |            |             | AmcAmCfTioCSGTeSxt              | 16      | ST29 Cplx  | CC29     |               |
| 16556          | Study A            | Eastern WA        | 65   | Calf          | 23               | -                                      |            |             | AmcAmCfTioCSGTeSxt              | 16      | ST29 Cplx  | CC29     |               |
| 16559          | Study A            | Eastern WA        | 65   | Calf          | 26               | -                                      |            |             | AmcAmCfTioCSGTeSxt              | 3042    |            |          |               |
| 16563          | Study A            | Eastern WA        | 65   | Calf          | 32               | -                                      |            |             | CSGTeSxt                        | 4092    |            | CC58     |               |
| 16577          | Study A            | Eastern WA        | 65   | Calf          | 53               | -                                      |            |             | AmG                             | 101     | ST101 Cplx |          |               |
| 16578          | Study A            | Eastern WA        | 65   | Calf          | 55               | -                                      |            |             |                                 | 4088    |            |          |               |
| 16582          | Study A            | Eastern WA        | 65   | Calf          | 59               | -                                      |            |             |                                 | 1415    |            | CC10     |               |
| 16585          | Study A            | Eastern WA        | 65   | Adult         |                  | -                                      |            |             |                                 | 2040    |            |          |               |
| 16586          | Study A            | Eastern WA        | 65   | Adult         |                  | -                                      |            |             | CGSGTe                          | 1408    |            |          |               |
| 16587          | Study A            | Eastern WA        | 65   | Adult         |                  | -                                      |            |             |                                 | 95      | ST95 Cplx  |          |               |
| 16588          | Study A            | Eastern WA        | 41   | Calf          | 2                | -                                      |            |             |                                 | 1137    |            | CC10     |               |
| 16608          | Study A            | Eastern WA        | 41   | Calf          | 27               | -                                      |            |             |                                 | 29      | ST29 Cplx  | CC29     |               |
| 16611          | Study A            | Eastern WA        | 41   | Calf          | 30               | -                                      |            |             | AmcAmCfTio                      | 723     |            | CC29     |               |
| 16613          | Study A            | Eastern WA        | 41   | Calf          | 36               | -                                      |            |             | AmSTe                           | 1139    |            |          |               |
| 16619          | Study A            | Eastern WA        | 41   | Calf          | 43               | -                                      |            |             |                                 | 446     | ST446 Cplx |          |               |
| 16620          | Study A            | Eastern WA        | 41   | Calf          | 44               | -                                      |            |             |                                 | 1125    |            |          |               |
| 16629          | Study A            | Eastern WA        | 41   | Calf          | 60               | -                                      |            |             |                                 | 10      | ST10 Cplx  | CC10     |               |
| 16630          | Study A            | Eastern WA        | 41   | Calf          | 60               | -                                      |            |             |                                 | 58      | ST155 Cplx | CC58     |               |
| 16652          | Study A            | Northwestern WA   | 11   | Calf          | 21               | -                                      |            |             | SGTeSxt                         | 69      | ST69 Cplx  |          |               |
| 16657          | Study A            | Northwestern WA   | 11   | Calf          | 30               | -                                      |            |             | SGTe                            | 88      | ST23 Cplx  | CC88     |               |
| 16662          | Study A            | Northwestern WA   | 11   | Calf          | 40               | -                                      |            |             |                                 | 4251    |            |          |               |
| 16666          | Study A            | Northwestern WA   | 11   | Calf          | 47               | -                                      |            |             | SGTe                            | 56      | ST155 Cplx |          |               |
| 16683          | Study A            | Eastern WA        | 38   | Calf          | 38               | -                                      |            |             |                                 | 58      | ST155 Cplx | CC58     |               |
| 16687          | Study A            | Eastern WA        | 38   | Calf          | 45               | -                                      |            |             |                                 | 3042    |            |          |               |
| 16694          | Study A            | Eastern WA        | 38   | Calf          | 54               | -                                      |            |             | AmcAmCfTioCSGTe                 | 1889    |            |          |               |
| 16700          | Study A            | Northwestern WA   | 1    | Adult         |                  | -                                      |            |             |                                 | 345     |            |          |               |
| 16701          | Study A            | Northwestern WA   | 1    | Adult         |                  | -                                      |            |             |                                 | 58      | ST155 Cplx | CC58     |               |
| 16702          | Study A            | Northwestern WA   | 1    | Adult         |                  | -                                      |            |             |                                 | 388     |            |          |               |
| 16709          | Study A            | Northwestern WA   | 1    | Calf          | 6                | -                                      |            |             | AmcAmCfCSGTeSxt                 | 761     |            | CC10     |               |
| 16712          | Study A            | Northwestern WA   | 1    | Calf          | 10               | -                                      |            |             | AmCfSGTeSxt                     | 69      | ST69 Cplx  |          |               |
| 16717          | Study A            | Northwestern WA   | 1    | Calf          | 18               | -                                      |            |             | AmCGSGTeSxt                     | 362     |            |          |               |
| 16720          | Study A            | Northwestern WA   | 1    | Calf          | 21               | -                                      |            |             | AmSGTeSxt                       | 3057    |            |          |               |
| 16722          | Study A            | Northwestern WA   | 1    | Calf          | 24               | -                                      |            |             | AmcAmCfTioCSGTeSxt              | 16      | ST29 Cplx  | CC29     |               |
| 16725          | Study A            | Northwestern WA   | 1    | Calf          | 28               | -                                      |            |             | AmCNaSGTeSxt                    | 4025    |            |          |               |
| 16726          | Study A            | Northwestern WA   | 1    | Calf          | 30               | -                                      |            |             | AmSTe                           | 58      | ST155 Cplx | CC58     |               |
| 16739          | Study A            | Northwestern WA   | 1    | Calf          | 48               | -                                      |            |             | AmCSGTeSxt                      | 336     | ST278 Cplx |          |               |
| 16740          | Study A            | Northwestern WA   | 1    | Calf          | 49               | -                                      |            |             | CSGTeSxt                        | 3042    |            |          |               |
| 16759          | Study A            | Eastern WA        | 32   | Calf          | 57               | +                                      | 9          |             | AmCfTioCGTe                     | 86      | ST86 Cplx  |          | NT            |
| 16765          | Study A            | Eastern WA        | 32   | Adult         |                  | +                                      | 9          |             | AmCfTioSGTeSxt                  | 746     |            |          | FIB           |
| 16810          | Study A            | Eastern WA        | 32   | Calf          | 9                | +                                      | 9          |             | AnAmCfTioCGNaSGTeSxt            | 58      | ST155 Cplx | CC58     | II            |

| Isolate number | Study <sup>a</sup> | Washington Region | Farm | Calf or Adult | Calf age in days | <i>bla</i> <sub>CTX-M</sub> PCR Result | CTXM Group | CTXM-Allele | Resistance profile <sup>b</sup> | MLST ST | ST complex | eBURSTCC | Replicon Type |
|----------------|--------------------|-------------------|------|---------------|------------------|----------------------------------------|------------|-------------|---------------------------------|---------|------------|----------|---------------|
| 16868          | Study A            | Eastern WA        | 32   | Calf          | 19               | +                                      | 9          |             | AnAmCfTioCGNaSGTeSxt            | 58      | ST155 Cplx | CC58     | II            |
| 16879          | Study A            | Eastern WA        | 32   | Calf          | 32               | +                                      | 9          | CTXM-27     | AmCfTioCGTe                     | 10      | ST10 Cplx  | CC10     | II            |
| 16903          | Study A            | Eastern WA        | 38   | Adult         |                  | -                                      |            |             |                                 | 4093    |            |          |               |
| 16904          | Study A            | Eastern WA        | 38   | Adult         |                  | -                                      |            |             | AmCGTe                          | 4086    |            |          |               |
| 16912          | Study A            | Eastern WA        | 38   | Calf          | 11               | -                                      |            |             | AmcAmCfTioSGTeSxt               | 46      | ST46 Cplx  |          |               |
| 16917          | Study A            | Eastern WA        | 38   | Calf          | 17               | -                                      |            |             |                                 | 58      | ST155 Cplx | CC58     |               |
| 16923          | Study A            | Eastern WA        | 38   | Calf          | 27               | -                                      |            |             |                                 | 1086    |            |          |               |
| 16948          | Study A            | Eastern WA        | 32   | Calf          | 17               | -                                      |            |             | AnAmCfTioCGNaSGTeSxt            | 617     | ST10 Cplx  |          |               |
| 16952          | Study A            | Eastern WA        | 32   | Calf          | 23               | -                                      |            |             | AmcAmCfTioCNaSGTeSxt            | 17      | ST20 Cplx  |          |               |
| 16958          | Study A            | Eastern WA        | 32   | Calf          | 30               | -                                      |            |             | AmcAmCfTioCSGTeSxt              | 10      | ST10 Cplx  | CC10     |               |
| 16966          | Study A            | Eastern WA        | 32   | Calf          | 42               | -                                      |            |             | AmcAmCfCSGTeSxt                 | 410     | ST23 Cplx  |          |               |
| 16980          | Study A            | Eastern WA        | 21   | Calf          | 56               | +                                      | 1          |             | AmCfTioSGTeSxt                  | 540     |            |          |               |
| 16994          | Study A            | Eastern WA        | 120  | Calf          | 50               | +                                      | 1          | CTXM-15     | AmCfTioCNaSGTeSxt               | 744     |            | CC10     | II            |
| 17002          | Study A            | Eastern WA        | 120  | Adult         |                  | +                                      | 9          |             | AmcAmCfTioGTeSxt                | 46      | ST46 Cplx  |          | NT            |
| 17006          | Study A            | Eastern WA        | 32   | Calf          | 60               | -                                      |            |             | AmcAmCfTioCSGTeSxt              | 10      | ST10 Cplx  | CC10     |               |
| 17008          | Study A            | Eastern WA        | 32   | Adult         |                  | -                                      |            |             | STe                             | 327     |            |          |               |
| 17010          | Study A            | Eastern WA        | 32   | Adult         |                  | -                                      |            |             |                                 | 13      | ST13 Cplx  |          |               |
| 17015          | Study A            | Eastern WA        | 54   | Adult         |                  | -                                      |            |             |                                 | 2766    |            |          |               |
| 17016          | Study A            | Eastern WA        | 54   | Adult         |                  | -                                      |            |             |                                 | 278     | ST278 Cplx |          |               |
| 17017          | Study A            | Eastern WA        | 54   | Adult         |                  | -                                      |            |             |                                 | 1704    |            |          |               |
| 17029          | Study A            | Eastern WA        | 54   | Calf          | 14               | -                                      |            |             | AmcAmCfTioCSGTeSxt              | 4085    |            |          |               |
| 17033          | Study A            | Eastern WA        | 54   | Calf          | 19               | -                                      |            |             | AmSGTe                          | 21      | ST29 Cplx  | CC29     |               |
| 17035          | Study A            | Eastern WA        | 54   | Calf          | 21               | -                                      |            |             | CSGTe                           | 540     |            |          |               |
| 17051          | Study A            | Eastern WA        | 54   | Calf          | 46               | -                                      |            |             | AmcAmCfCSGTe                    | 48      | ST10 Cplx  | CC10     |               |
| 17058          | Study A            | Eastern WA        | 54   | Calf          | 56               | -                                      |            |             | AmcAmCfCSGTe                    | 48      | ST10 Cplx  | CC10     |               |
| 17072          | Study A            | Eastern WA        | 21   | Calf          | 34               | -                                      |            |             | CNaSGTeSxt                      | 16      | ST29 Cplx  | CC29     |               |
| 17079          | Study A            | Eastern WA        | 21   | Calf          | 33               | -                                      |            |             | AmCGGTeSxt                      | 336     | ST278 Cplx |          |               |
| 17105          | Study A            | Northwestern WA   | 25   | Calf          | 1                | -                                      |            |             |                                 | 155     | ST155 Cplx | CC58     |               |
| 17112          | Study A            | Northwestern WA   | 25   | Calf          | 9                | -                                      |            |             | AmcAmCfs                        | 69      | ST69 Cplx  |          |               |
| 17121          | Study A            | Northwestern WA   | 25   | Calf          | 23               | -                                      |            |             | AmcAmCfTioSGTeSxt               | 117     |            |          |               |
| 17128          | Study A            | Northwestern WA   | 25   | Calf          | 33               | -                                      |            |             | GTe                             | 2522    |            |          |               |
| 17232          | Study A            | Eastern WA        | 29   | Calf          | 45               | +                                      | 9          | CTXM-27     | AmcAmCfTioCSGTeSxt              | 761     |            | CC10     | FIB           |
| 17237          | Study A            | Eastern WA        | 120  | Calf          | 12               | +                                      | 1          | CTXM-15     | AmcAmCfTioCNaSGTeSxt            | 744     |            | CC10     | N             |
| 17240          | Study A            | Eastern WA        | 120  | Calf          | 15               | +                                      | 9          |             | AmcAmCfTioSGTeSxt               | 46      | ST46 Cplx  |          | NT            |
| 17254          | Study A            | Eastern WA        | 120  | Calf          | 35               | +                                      | 9          |             | AmcAmCfTioCSGTe                 | 23      | ST23 Cplx  | CC88     | NT            |
| 17269          | Study A            | Northwestern WA   | 15   | Calf          | 36               | -                                      |            |             |                                 | 4035    |            |          |               |
| 17280          | Study A            | Northwestern WA   | 15   | Calf          | 58               | -                                      |            |             |                                 | 677     |            |          |               |
| 17283          | Study A            | Northwestern WA   | 15   | Adult         |                  | -                                      |            |             |                                 | 1432    |            |          |               |
| 17284          | Study A            | Northwestern WA   | 15   | Adult         |                  | -                                      |            |             |                                 | 4095    |            |          |               |
| 17299          | Study A            | Eastern WA        | 55   | Calf          | 44               | +                                      | 9          |             | AmCfTioCGTe                     | 1252    |            |          |               |
| 17303          | Study A            | Eastern WA        | 55   | Calf          | 51               | +                                      | 1          |             | AmCfTioCNaSGTeSxt               | 361     |            |          |               |

| Isolate number | Study <sup>a</sup> | Washington Region | Farm | Calf or Adult | Calf age in days | <i>bla</i> <sub>CTX-M</sub> PCR Result | CTXM Group | CTXM-Allele | Resistance profile <sup>b</sup> | MLST ST | ST complex | eBURSTCC | Replicon Type |
|----------------|--------------------|-------------------|------|---------------|------------------|----------------------------------------|------------|-------------|---------------------------------|---------|------------|----------|---------------|
| 17308          | Study A            | Eastern WA        | 55   | Calf          | 30               | +                                      | 1          |             | AmCfTioCNaSGTeSxt               | 361     |            |          |               |
| 17322          | Study A            | Northwestern WA   | 9    | Calf          | 18               | -                                      |            |             |                                 | 20      | ST20 Cplx  |          |               |
| 17333          | Study A            | Northwestern WA   | 9    | Calf          | 34               | -                                      |            |             | GTe                             | 2522    |            |          |               |
| 17346          | Study A            | Northwestern WA   | 9    | Calf          | 52               | -                                      |            |             | AmCSGTe                         | 34      | ST10 Cplx  | CC10     |               |
| 17352          | Study A            | Northwestern WA   | 9    | Calf          | 58               | -                                      |            |             | SGTe                            | 85      |            |          |               |
| 17354          | Study A            | Northwestern WA   | 9    | Adult         |                  | -                                      |            |             | STe                             | 10      | ST10 Cplx  | CC10     |               |
| 17355          | Study A            | Northwestern WA   | 9    | Adult         |                  | -                                      |            |             |                                 | 4086    |            |          |               |
| 17405          | Study A            | Northwestern WA   | 6    | Adult         |                  | -                                      |            |             |                                 | 10      | ST10 Cplx  | CC10     |               |
| 17406          | Study A            | Northwestern WA   | 6    | Adult         |                  | -                                      |            |             | Te                              | 398     | ST398 Cplx |          |               |
| 17412          | Study A            | Northwestern WA   | 6    | Calf          | 23               | -                                      |            |             |                                 | 10      | ST10 Cplx  | CC10     |               |
| 17413          | Study A            | Northwestern WA   | 6    | Calf          | 27               | -                                      |            |             |                                 | 154     |            |          |               |
| 17417          | Study A            | Northwestern WA   | 6    | Calf          | 52               | -                                      |            |             |                                 | 1079    |            |          |               |
| 17419          | Study A            | Northwestern WA   | 6    | Calf          | 56               | -                                      |            |             |                                 | 58      | ST155 Cplx | CC58     |               |
| 17424          | Study A            | Northwestern WA   | 28   | Calf          | 24               | -                                      |            |             | CSGTe                           | 58      | ST155 Cplx | CC58     |               |
| 17427          | Study A            | Northwestern WA   | 28   | Calf          | 29               | -                                      |            |             |                                 | 446     | ST446 Cplx |          |               |
| 17432          | Study A            | Northwestern WA   | 28   | Calf          | 44               | -                                      |            |             | AmCfCGSGTeSxt                   | 88      | ST23 Cplx  | CC88     |               |
| 17433          | Study A            | Northwestern WA   | 28   | Calf          | 54               | -                                      |            |             |                                 | 58      | ST155 Cplx | CC58     |               |
| 17438          | Study A            | Northwestern WA   | 28   | Adult         |                  | -                                      |            |             |                                 | 48      | ST10 Cplx  | CC10     |               |
| 17439          | Study A            | Northwestern WA   | 15   | Calf          | 1                | -                                      |            |             |                                 | 10      | ST10 Cplx  | CC10     |               |
| 17446          | Study A            | Northwestern WA   | 25   | Calf          | 40               | -                                      |            |             |                                 | 20      | ST20 Cplx  |          |               |
| 17451          | Study A            | Northwestern WA   | 25   | Calf          | 45               | -                                      |            |             | AmCAmCfTio                      | 32      | ST32 Cplx  |          |               |
| 17465          | Study A            | Northwestern WA   | 25   | Adult         |                  | -                                      |            |             |                                 | 155     | ST155 Cplx | CC58     |               |
| 17466          | Study A            | Northwestern WA   | 25   | Adult         |                  | -                                      |            |             |                                 | 348     | ST156 Cplx |          |               |
| 17509          | Study A            | Northwestern WA   | 13   | Adult         |                  | -                                      |            |             |                                 | 4087    |            |          |               |
| 17573          | Study A            | Eastern WA        | 18   | Calf          | 41               | -                                      |            |             | AmCfCGTe                        | 4092    |            | CC58     |               |
| 17636          | Study A            | Eastern WA        | 21   | Adult         |                  | +                                      | 1          |             | AmCfTio                         | 154     |            |          |               |
| 17642          | Study A            | Eastern WA        | 54   | Calf          | 41               | -                                      |            |             | AmCAmCfCSGTe                    | 48      | ST10 Cplx  | CC10     |               |
| 17657          | Study A            | Eastern WA        | 18   | Calf          | 51               | +                                      | 1          | CTXM-15     | AmCfTioNaSGTeSxt                | 44      | ST10 Cplx  | CC10     | FIA/FIB       |
| 17699          | Study A            | Northwestern WA   | 1    | Calf          | 24               | +                                      | 1          |             | AmCfTioCNaSGTeSxt               | 744     |            | CC10     |               |
| 17701          | Study A            | Northwestern WA   | 1    | Calf          | 35               | +                                      | 1          | CTXM-15     | AmCAmCfTioCSGTeSxt              | 761     |            | CC10     | II            |
| 17706          | Study A            | Northwestern WA   | 1    | Calf          | 55               | +                                      | 1          |             | AmCfTioCNaSGTeSxt               | 744     |            | CC10     |               |
| 17720          | Study A            | Northwestern WA   | 25   | Calf          | 15               | +                                      | 1          |             | AmCfTioSTe                      | 58      | ST155 Cplx | CC58     |               |
| 17723          | Study A            | Northwestern WA   | 25   | Calf          | 19               | +                                      | 1          |             | AmCfTio                         | 224     |            |          | NT            |
| 17734          | Study A            | Northwestern WA   | 9    | Calf          | 4                | +                                      | 9          |             | AmCfTioSTe                      | 48      | ST10 Cplx  | CC10     |               |
| 19017          | Study A            | Eastern WA        | 29   | Adult         |                  | +                                      | 9          | CTXM-27     | AmCfTioCSGTeSxt                 | 761     |            | CC10     | NT            |
| 19018          | Study A            | Eastern WA        | 29   | Calf          | 20               | +                                      | 1          | CTXM-15     | AmCfTioGSGTeSxt                 | 88      | ST23 Cplx  | CC88     | II            |
| 19019          | Study A            | Eastern WA        | 29   | Calf          | 32               | +                                      | 1          | CTXM-15     | AmCfTioCNaSGTeSxt               | 744     |            | CC10     | NT            |
| 19020          | Study A            | Eastern WA        | 120  | Calf          | 3                | +                                      | 1          | CTXM-15     | AmCfTioCNaSGTeSxt               | 744     |            | CC10     | FIB           |
| 19021          | Study A            | Eastern WA        | 120  | Calf          | 53               | +                                      | 9          | CTXM-27     | AmCfTioCSGTe                    | 23      | ST23 Cplx  | CC88     | NT            |
| 19022          | Study A            | Eastern WA        | 120  | Adult         |                  | +                                      | 1          | CTXM-15     | AmCfTioCSGTeSxt                 | 744     |            | CC10     | II            |
| 19023          | Study A            | Eastern WA        | 65   | Calf          | 3                | +                                      | 1          | CTXM-15     | AmCfTioGSGTeSxt                 | 88      | ST23 Cplx  | CC88     | II            |

| Isolate number | Study <sup>a</sup> | Washington Region | Farm | Calf or Adult | Calf age in days | <i>bla</i> <sub>CTX-M</sub> PCR Result | CTXM Group | CTXM-Allele | Resistance profile <sup>b</sup> | MLST ST | ST complex | eBURSTCC | Replicon Type |
|----------------|--------------------|-------------------|------|---------------|------------------|----------------------------------------|------------|-------------|---------------------------------|---------|------------|----------|---------------|
| 19024          | Study A            | Eastern WA        | 65   | Calf          | 32               | +                                      | 1          | CTXM-15     | AmCfTioCSGTeSxt                 | 761     |            | CC10     | F             |
| 19025          | Study A            | Eastern WA        | 65   | Adult         |                  | +                                      | 1          | CTXM-15     | AmCfTioCSGTeSxt                 | 761     |            | CC10     | II            |
| 19026          | Study A            | Eastern WA        | 41   | Calf          | 28               | +                                      | 9          | CTXM-27     | AmCfTioCNaSGTeSxt               | 744     |            | CC10     | F             |
| 19027          | Study A            | Eastern WA        | 41   | Calf          | 46               | +                                      | 9          | CTXM-27     | AmCfTioSGTeSxt                  | 38      | ST38 Cplx  |          | FIB           |
| 19028          | Study A            | Eastern WA        | 32   | Calf          | 12               | +                                      | 1          | CTXM-15     | AnAmCfTioCGNaSGTeSxt            | 58      | ST155 Cplx | CC58     | II            |
| 19029          | Study A            | Eastern WA        | 32   | Calf          | 36               | +                                      | 1          | CTXM-15     | AmCfTioSTe                      | 86      | ST86 Cplx  |          | NT            |
| 19030          | Study A            | Eastern WA        | 32   | Adult         |                  | +                                      | 9          | CTXM-27     | AmCfTioCSGTe                    | 10      | ST10 Cplx  | CC10     | N             |
| 19031          | Study A            | Eastern WA        | 54   | Adult         |                  | +                                      | 9          | CTXM-27     | AmCfTioSTe                      | 48      | ST10 Cplx  | CC10     | N             |
| 19032          | Study A            | Eastern WA        | 54   | Calf          | 29               | +                                      | 9          | CTXM-27     | AmCfTioSGTeSxt                  | 48      | ST10 Cplx  | CC10     | FIA           |
| 19033          | Study A            | Eastern WA        | 54   | Calf          | 50               | +                                      | 9          | CTXM-27     | AmCfTioCSGTeSxt                 | 48      | ST10 Cplx  | CC10     | FIA           |
| 19034          | Study A            | Eastern WA        | 21   | Calf          | 27               | +                                      | 9          | CTXM-14     | AmCfTioSGTeSxt                  | 540     |            |          | NT            |
| 19035          | Study A            | Eastern WA        | 21   | Calf          | 52               | +                                      | 9          | CTXM-14     | AmCfTioSGTeSxt                  | 540     |            |          | FIA           |
| 19036          | Study A            | Eastern WA        | 21   | Adult         |                  | +                                      | 9          | CTXM-14     | AmCfTio                         | 154     |            |          | II            |
| 19037          | Study A            | Eastern WA        | 38   | Adult         |                  | +                                      | 9          | CTXM-14     | AmCfTioCNaSGTeSxt               | 744     |            | CC10     | NT            |
| 19038          | Study A            | Eastern WA        | 38   | Calf          | 30               | +                                      | 9          | CTXM-27     | AmCfTioCSGTeSxt                 | 761     |            | CC10     |               |
| 19039          | Study A            | Eastern WA        | 38   | Calf          | 37               | +                                      | 9          | CTXM-27     | AmCfTioCSGTeSxt                 | 761     |            | CC10     | FIB           |
| 19040          | Study A            | Northwestern WA   | 1    | Adult         |                  | +                                      | 1          | CTXM-15     | AmCfTio                         | 227     | ST10 Cplx  |          | II            |
| 19041          | Study A            | Northwestern WA   | 1    | Calf          | 5                | +                                      | 1          | CTXM-15     | AmCfTio                         | 219     |            |          | II            |
| 19042          | Study A            | Northwestern WA   | 1    | Calf          | 51               | +                                      | 1          | CTXM-15     | AmCfTioCNaSGTeSxt               | 744     |            | CC10     | II            |
| 19043          | Study A            | Northwestern WA   | 25   | Calf          | 16               | +                                      | 1          | CTXM-15     | AmCfTioSTe                      | 58      | ST155 Cplx | CC58     | II            |
| 19044          | Study A            | Northwestern WA   | 25   | Calf          | 46               | +                                      | 1          | CTXM-15     | AmCfTio                         | 154     |            |          | II            |
| 19045          | Study A            | Northwestern WA   | 25   | Adult         |                  | +                                      | 1          | CTXM-15     | AmCfTio                         | 154     |            |          | II            |
| 19046          | Study A            | Northwestern WA   | 13   | Calf          | 5                | +                                      | 9          | CTXM-14     | AmCfTioCNaSGTeSxt               | 744     |            | CC10     | II            |
| 19047          | Study A            | Eastern WA        | 55   | Adult         |                  | +                                      | 1          | CTXM-15     | AmCfTioCNaSGTeSxt               | 361     |            |          | FIB           |
| 19048          | Study A            | Eastern WA        | 55   | Calf          | 26               | +                                      | 1          | CTXM-15     | AmCfTioCNaSGTeSxt               | 361     |            |          | FIA/II        |
| 19049          | Study A            | Eastern WA        | 55   | Calf          | 34               | +                                      | 1          | CTXM-15     | AmCfTioCNaSGTeSxt               | 10      | ST10 Cplx  | CC10     |               |
| 19050          | Study A            | Eastern WA        | 18   | Calf          | 7                | +                                      | 9          | CTXM-27     | AmCfTioCSGTeSxt                 | 761     |            | CC10     | FIB           |
| 19051          | Study A            | Eastern WA        | 18   | Calf          | 40               | +                                      | 1          | CTXM-15     | AmCfTioCNaSGTeSxt               | 44      | ST10 Cplx  | CC10     |               |
| 19052          | Study A            | Northwestern WA   | 9    | Calf          | 10               | +                                      | 9          | CTXM-65     | AmCfTioGSGTeSxt                 | 69      | ST69 Cplx  |          | N             |
| 19053          | Study A            | Northwestern WA   | 9    | Calf          | 51               | +                                      | 9          | CTXM-65     | AmCfTio                         | 540     |            |          | II            |
| 19054          | Study A            | Northwestern WA   | 9    | Adult         |                  | +                                      | 9          | CTXM-27     | AmCfTioSTe                      | 48      | ST10 Cplx  | CC10     | FIA           |
| 19055          | Study A            | Northwestern WA   | 11   | Calf          | 9                | +                                      | 9          | CTXM-27     | AmCfTioCNaSGTeSxt               | 744     |            | CC10     | N             |
| 19056          | Study A            | Northwestern WA   | 11   | Calf          | 24               | +                                      | 9          | CTXM-14     | AmCfTioCNaSGTeSxt               | 448     | ST448 Cplx |          | FIA           |
| 19057          | Study A            | Northwestern WA   | 6    | Adult         |                  | +                                      | 9          | CTXM-24     | AmCfTioTe                       | 48      | ST10 Cplx  | CC10     | FIB           |
| 19058          | Study A            | Northwestern WA   | 6    | Calf          | 7                | +                                      | 9          | CTXM-24     | AmCfTioTe                       | 48      | ST10 Cplx  | CC10     |               |
| 19059          | Study A            | Northwestern WA   | 6    | Calf          | 52               | +                                      | 9          | CTXM-65     | AmCfTio                         | 540     |            |          | N             |
| 19060          | Study A            | Northwestern WA   | 28   | Calf          | 34               | +                                      | 9          | CTXM-14     | AmCfTioCSGTeSxt                 | 155     | ST155 Cplx | CC58     | FIB           |
| 19061          | Study A            | Northwestern WA   | 28   | Calf          | 43               | +                                      | 9          | CTXM-14     | AmCfTioCSGTeSxt                 | 155     | ST155 Cplx | CC58     | FIB           |
| 19062          | Study A            | Northwestern WA   | 28   | Adult         |                  | +                                      | 9          | CTXM-14     | AmCfTioCSGTeSxt                 | 155     | ST155 Cplx | CC58     | FIB           |
| 19063          | Study A            | Northwestern WA   | 15   | Calf          | 2                | +                                      | 9          | CTXM-14     | AmCfTioCNaSGTeSxt               | 162     | ST469 Cplx |          | FIB           |
| 19064          | Study A            | Northwestern WA   | 15   | Calf          | 50               | +                                      | 9          | CTXM-14     | AmCfTioCNaSGTeSxt               | 162     | ST469 Cplx |          | FIB           |



| Isolate number | Study <sup>a</sup> | Washington Region | Farm | Calf or Adult | Calf age in days | <i>bla</i> <sub>CTX-M</sub> PCR Result | CTXM Group | CTXM-Allele | Resistance profile <sup>b</sup> | MLST ST | ST complex | eBURSTCC | Replicon Type |
|----------------|--------------------|-------------------|------|---------------|------------------|----------------------------------------|------------|-------------|---------------------------------|---------|------------|----------|---------------|
| 19065          | Study A            | Northwestern WA   | 15   | Adult         |                  | +                                      | 9          | CTXM-14     | AmCfTioCSGTeSxt                 | 155     | ST155 Cplx | CC58     | FIB           |
| 19066          | Study A            | Eastern WA        | 29   | Calf          | 11               | +                                      | 9          |             | AmCfTioCSGTeSxt                 | 761     |            | CC10     |               |
| 19067          | Study A            | Eastern WA        | 29   | Calf          | 13               | +                                      | 9          |             | AnGSGTeSxt                      | 761     |            | CC10     |               |
| 19068          | Study A            | Eastern WA        | 38   | Calf          | 25               | +                                      | 9          |             | AmCfTioCSGTeSxt                 | 761     |            | CC10     |               |
| 19069          | Study A            | Eastern WA        | 38   | Calf          | 45               | +                                      | 1          |             | AmCfTioSGTeSxt                  | 38      | ST38 Cplx  |          | NT            |
| 19070          | Study A            | Eastern WA        | 32   | Calf          | 34               | -                                      |            |             | AmCfTioSGTeSxt                  | 196     |            |          |               |
| 19072          | Study A            | Northwestern WA   | 15   | Calf          | 10               | -                                      |            |             | AmCfTioSGTeSxt                  | 156     | ST156 Cplx |          |               |
| 18991          | Study B            | Eastern WA        | 35   | Calf          | 29               | +                                      | 1          | CTXM-15     | AmCfTioCSGTeSxt                 | 88      | ST23 Cplx  | CC88     | FIB           |
| 18992          | Study B            | Eastern WA        | 35   | Calf          | 65               | +                                      | 9          | CTXM-27     | AmCfTioCNaSGTeSxt               | 4096    |            |          | FIB           |
| 18993          | Study B            | Eastern WA        | 35   | Adult         |                  | +                                      | 9          | CTXM-65     | AmCfTio                         | 685     |            |          | FIB           |
| 18994          | Study B            | Eastern WA        | 3    | Calf          | 7                | +                                      | 9          | CTXM-27     | AmCfTio                         | 32      | ST32 Cplx  |          | FIB           |
| 18995          | Study B            | Eastern WA        | 3    | Calf          | 54               | +                                      | 1          | CTXM-15     | AmCfTio                         | 349     | ST349 Cplx |          | FIB           |
| 18996          | Study B            | Eastern WA        | 3    | Adult         |                  | +                                      | 1          | CTXM-15     | AmCfTio                         | 345     |            |          | II            |
| 18997          | Study B            | Eastern WA        | 60   | Calf          | 22               | +                                      | 1          | CTXM-15     | AnAmCfTioGNaSGTeSxt             | 744     |            | CC10     | FIB           |
| 18998          | Study B            | Eastern WA        | 60   | Calf          | 32               | +                                      | 1          | CTXM-15     | AnAmCfTioGNaSGTeSxt             | 744     |            | CC10     | II            |
| 18999          | Study B            | Eastern WA        | 60   | Adult         |                  | +                                      | 1          | CTXM-15     | AmCfTioGSGSxt                   | 88      | ST23 Cplx  | CC88     | FIB           |
| 19000          | Study B            | Eastern WA        | 47   | Calf          | 11               | +                                      | 9          | CTXM-14     | AmCfTioCSGTeSxt                 | 1163    |            |          | A/C           |
| 19001          | Study B            | Eastern WA        | 47   | Calf          | 33               | +                                      | 1          | CTXM-15     | AmCfTioGNaSGSxt                 | 744     |            | CC10     | FIB           |
| 19002          | Study B            | Eastern WA        | 47   | Adult         |                  | +                                      | 1          | CTXM-55     | AmCfTioGTeSxt                   | 38      | ST38 Cplx  |          | FIA           |
| 19004          | Study B            | Eastern WA        | 37   | Adult         |                  | +                                      | 1          | CTXM-15     | AmCfTioNaSGTeSxt                | 361     |            |          | FIA/FIB       |
| 19005          | Study B            | Eastern WA        | 37   | Calf          | 2                | +                                      | 1          | CTXM-15     | AmCfTioCNaSGTeSxt               | 761     |            | CC10     | II            |
| 19006          | Study B            | Eastern WA        | 39   | Calf          | 41               | +                                      | 9          | CTXM-27     | AmCfTioCSGTeSxt                 | 761     |            | CC10     | FIB           |
| 19008          | Study B            | Eastern WA        | 49   | Calf          | 16               | +                                      | 1          | CTXM-15     | AmCfTioCNaSGTeSxt               | 744     |            | CC10     | II            |
| 19009          | Study B            | Eastern WA        | 49   | Calf          | 46               | +                                      | 9          | CTXM-27     | AmCfTioGSxt                     | 58      | ST155 Cplx | CC58     | FIB           |
| 19010          | Study B            | Eastern WA        | 49   | Adult         |                  | +                                      | 9          | CTXM-27     | AmCfTioCGSxt                    | 58      | ST155 Cplx | CC58     | FIB           |
| 19011          | Study B            | Eastern WA        | 51   | Calf          | 9                | +                                      | 1          | CTXM-15     | AmCfTioCNaSGTeSxt               | 361     |            |          | NT            |
| 19013          | Study B            | Eastern WA        | 51   | Adult         |                  | +                                      | 1          | CTXM-15     | AmCfTioNa                       | 90      | ST23 Cplx  | CC88     | F             |
| 19014          | Study B            | Eastern WA        | 46   | Calf          | 14               | +                                      | 1          | CTXM-15     | AmCfTioGSGSxt                   | 88      | ST23 Cplx  | CC88     | NT            |
| 19015          | Study B            | Eastern WA        | 46   | Calf          | 48               | +                                      | 1          | CTXM-15     | AmCfTioGSGSxt                   | 88      | ST23 Cplx  | CC88     | NT            |
| 19016          | Study B            | Eastern WA        | 46   | Adult         |                  | +                                      | 1          | CTXM-15     | AmCfTioGSGSxt                   | 88      | ST23 Cplx  | CC88     | NT            |

<sup>a</sup> Study A includes the 252 isolates chosen for the current study; Study B includes 23 additional isolates from the same region and times period that were used to add data concerning plasmid types and *bla*CTX-M alleles.

<sup>b</sup> An, amikacin; Amc, amoxicillin/clavulanic acid; Am, ampicillin; Tio, ceftiofur; Cf, cephalothin; C, chloramphenicol; G, gentamicin; Na, nalidixic acid; S, streptomycin; S, sulfisoxazole; Te, tetracycline; Sxt, trimethoprim/sulfamethoxazole. A blank indicates susceptibility to all antibiotics tested.

Table S3. Geographic distribution of Clonal Complexes between two regions of Washington State. There were no significant differences between the two regions with regard to the proportions of the major clonal complexes. The distributions of clonal complexes did not differ significantly between *bla*<sub>CTX-M</sub>-negative *E. coli* from the two regions and the same was true for *bla*<sub>CTX-M</sub>-positive *E. coli* from the two regions (R X C Fisher's Chi-square test  $P > 0.3$ ).

| Clonal Complex                          | Northwestern Washington (Region 1)             |                                                    |                         | Eastern Washington (Region 2)                  |                                                    |                         |
|-----------------------------------------|------------------------------------------------|----------------------------------------------------|-------------------------|------------------------------------------------|----------------------------------------------------|-------------------------|
|                                         | <i>bla</i> <sub>CTX-M</sub> -negative<br>N (%) | <i>bla</i> <sub>CTX-M</sub> -<br>positive<br>N (%) | Region 1 total<br>N (%) | <i>bla</i> <sub>CTX-M</sub> -negative<br>N (%) | <i>bla</i> <sub>CTX-M</sub> -<br>positive<br>N (%) | Region 2 total<br>N (%) |
| CC10                                    | 7 (14.6)                                       | 19 (39.6)                                          | 26 (27.1)               | 12 (15.4)                                      | 44 (56.4)                                          | 56 (35.9)               |
| CC29                                    | 1 (2.1)                                        | 0.0                                                | 1 (1.0)                 | 10 (12.8)                                      | 0.0                                                | 10 (6.4)                |
| CC58                                    | 7 (14.6)                                       | 8 (16.7)                                           | 15 (15.6)               | 9 (11.5)                                       | 4 (5.1)                                            | 13 (8.3)                |
| CC88                                    | 2 (4.2)                                        | 1 (2.1)                                            | 3 (3.1)                 | 2 (2.6)                                        | 5 (6.4)                                            | 7 (4.5)                 |
| Singletons, or no<br>identified founder | 31 (64.6)                                      | 20 (41.7)                                          | 51 (53.1)               | 45 (57.7)                                      | 25 (32.1)                                          | 70 (44.9)               |
| Total                                   | 48 (100.0)                                     | 48 (100.0)                                         | 96 (100.0)              | 78 (100.0)                                     | 78 (100.0)                                         | 156 (100.0)             |
